# Supplementary material
Source: PubMed Central journal article supplement (PMC3183155)
Supplement: NIHMS315252-supplement-01.pdf [file NIHMS315252-supplement-01.pdf]

## SUPPLEMENTAL MATERIAL

**Supplemental Table 1.** Multivariate hazard ratio (95% confidence intervals) of stroke risk according to depression status in different subgroups in the Nurses' Health Study (2000-2006).\*

| Stratified factors              | No. of<br>stroke | No depression | Depression       | P for<br>interaction |
|---------------------------------|------------------|---------------|------------------|----------------------|
| Age Group, years                |                  |               |                  |                      |
| <70                             | 286              | 1.00          | 1.51 (1.17-1.93) | 0.23                 |
| ≥70                             | 747              | 1.00          | 1.21 (1.02-1.42) |                      |
| History of Hypertension         |                  |               |                  |                      |
| No                              | 273              | 1.00          | 1.28 (0.96-1.69) | 0.90                 |
| Yes                             | 760              | 1.00          | 1.29 (1.10-1.51) |                      |
| History of Hypercholesterolemia |                  |               |                  |                      |
| No                              | 274              | 1.00          | 1.36 (1.03-1.79) | 0.93                 |
| Yes                             | 759              | 1.00          | 1.27 (1.08-1.48) |                      |
| History of diabetes             |                  |               |                  |                      |
| No                              | 841              | 1.00          | 1.28 (1.09-1.49) | 0.60                 |
| Yes                             | 192              | 1.00          | 1.32 (0.98-1.79) |                      |
| History of heart diseases       |                  |               |                  |                      |
| No                              | 785              | 1.00          | 1.37 (1.17-1.61) | 0.26                 |
| Yes                             | 248              | 1.00          | 1.08 (0.83-1.42) |                      |
| History of cancer               |                  |               |                  |                      |
| No                              | 822              | 1.00          | 1.29 (1.10-1.50) | 0.87                 |

Yes

211

1.00

1.31 (0.97-1.76)

---

\*Adjusted for age (continuous), marital status, parental history of myocardial infarction, ethnicity, physical activity level body mass index, alcohol consumption, smoking status, menopausal status, postmenopausal hormone therapy, current aspirin use, current multivitamin use, Dietary Approaches to Stop Hypertension dietary score, history of hypertension, hypercholesterolemia, diabetes, cancer and heart diseases; but not for stratified factor itself.

**Supplemental Table 2.** Hazard ratio (95% confidence intervals) of incident stroke according to the types of antidepressant medication use: Nurses' Health Study (2000-2006).

| Outcome                | No ADM use | ADM use          | Further categorized according to types of ADMs |                             |                          |
|------------------------|------------|------------------|------------------------------------------------|-----------------------------|--------------------------|
|                        |            |                  | SSRIs                                          | Other ADMs<br>(mainly TCAs) | SSRIs plus<br>other ADMs |
| Total Stroke           |            |                  |                                                |                             |                          |
| Cases/Person-years     | 893/409753 | 140/49303        | 97/31661                                       | 38/14972                    | 5/2669                   |
| Age-adjusted model     | 1.00       | 1.50 (1.25-1.79) | 1.60 (1.29-1.97)                               | 1.33 (0.96-1.83)            | 1.22 (0.51-2.94)         |
| Multivariate model 1   | 1.00       | 1.37 (1.14-1.64) | 1.47 (1.19-1.81)                               | 1.21 (0.87-1.68)            | 1.07 (0.44-2.58)         |
| Multivariate model 2   | 1.00       | 1.30 (1.08-1.55) | 1.39 (1.13-1.72)                               | 1.14 (0.82-1.58)            | 0.99 (0.41-2.39)         |
| Hemorrhagic Stroke     |            |                  |                                                |                             |                          |
| Cases/Person-years     | 109/410479 | 15/49412         | 10/31736                                       | 5/15003                     | 0/2674                   |
| Age-adjusted model     | 1.00       | 1.28 (0.75-2.21) | 1.33 (0.70-2.55)                               | 1.36 (0.56-3.35)            | -                        |
| Multivariate model 1   | 1.00       | 1.21 (0.70-2.09) | 1.27 (0.66-2.45)                               | 1.26 (0.51-3.10)            | -                        |
| Multivariate model 2   | 1.00       | 1.19 (0.69-2.06) | 1.25 (0.65-2.41)                               | 1.24 (0.50-3.05)            | -                        |
| Ischemic Stroke        |            |                  |                                                |                             |                          |
| Cases/Person-years     | 468/410117 | 70/49366         | 45/31707                                       | 21/14990                    | 4/2669                   |
| Age-adjusted model     | 1.00       | 1.43 (1.12-1.84) | 1.42 (1.05-1.93)                               | 1.41 (0.91-2.18)            | 1.84 (0.69-4.93)         |
| Multivariate model 1   | 1.00       | 1.29 (1.00-1.67) | 1.29 (0.95-1.75)                               | 1.26 (0.81-1.96)            | 1.62 (0.60-4.33)         |
| Multivariate model 2   | 1.00       | 1.23 (0.95-1.58) | 1.23 (0.90-1.67)                               | 1.19 (0.76-1.84)            | 1.50 (0.56-4.03)         |
| Stroke of Unknown Type |            |                  |                                                |                             |                          |
| Cases/Person-years     | 316/410320 | 55/49382         | 42/31710                                       | 12/14999                    | 1/2673                   |

|                      |      |                  |                  |                  |   |
|----------------------|------|------------------|------------------|------------------|---|
| Age-adjusted model   | 1.00 | 1.66 (1.25-2.22) | 1.95 (1.41-2.69) | 1.19 (0.67-2.12) | - |
| Multivariate model 1 | 1.00 | 1.53 (1.14-2.04) | 1.79 (1.29-2.47) | 1.10 (0.62-1.97) | - |
| Multivariate model 2 | 1.00 | 1.43 (1.07-1.92) | 1.68 (1.21-2.33) | 1.03 (0.58-1.83) | - |

---

Abbreviations: ADM, antidepressant medication; SSRI, selective serotonin reuptake inhibitor; TCA, tricyclic antidepressant.

Multivariate model 1: adjusted for age, marital status, parental history of myocardial infarction, ethnicity, physical activity level, body mass index, alcohol consumption, smoking status, menopausal status, postmenopausal hormone therapy, current aspirin use, current multivitamin use, Dietary Approaches to Stop Hypertension dietary score.

Multivariate model 2: multivariate model 1 plus history of hypertension, hypercholesterolemia, diabetes, cancer and heart diseases.
